# Supplementary figures and images for: An edge-contacted pn-heterojunction of a p-SWCNT/n-WO3 thin film
Source: Royal Society of Chemistry journal article supplement (doi:10.1039/c3tc30845f), 2013-01-01

## Supporting information

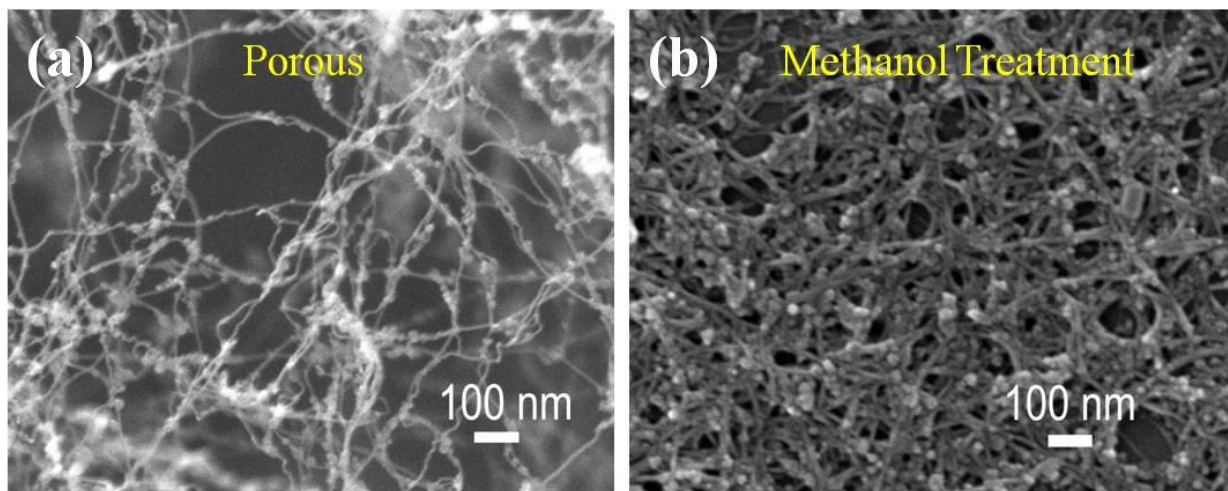

5 Fig. S1. SEM images of SWCNTs before (a) and after (b) methanol treatment

Supplement: c3tc30845f.pdf [file c3tc30845f.pdf]
